# Supplementary material
Source: PubMed Central journal article supplement (PMC3417213)
Supplement: supp_112.040287_ajcn040287-STable1.pdf [file supp_112.040287_ajcn040287-STable1.pdf]

**Dietary fat quality and risk of sudden cardiac death in women**

Chiuvè et al

Supplemental Table. Multivariable relative risk (RR) of SCD by quintiles of fatty acid intake (% total fat) derived from the exposure distribution of the cases

|                                                          | Quintiles of fatty acid intake (% total fat) based on distribution in cases |                      |                      |                      |                      | P, linear trend <sup>1</sup> |
|----------------------------------------------------------|-----------------------------------------------------------------------------|----------------------|----------------------|----------------------|----------------------|------------------------------|
|                                                          | 1                                                                           | 2                    | 3                    | 4                    | 5                    |                              |
| <b>Saturated</b>                                         |                                                                             |                      |                      |                      |                      |                              |
| Median, % of total fat                                   | 33.1                                                                        | 36.8                 | 39.3                 | 41.4                 | 44.7                 |                              |
| Cases                                                    | 77                                                                          | 77                   | 77                   | 75                   | 79                   |                              |
| RR (95%CI) of SCD                                        |                                                                             |                      |                      |                      |                      |                              |
| Multivariable model <sup>2</sup>                         | 1.0 (REF)                                                                   | 1.10<br>(0.80, 1.51) | 1.55<br>(1.12, 2.13) | 1.60<br>(1.16, 2.21) | 1.61<br>(1.16, 2.22) | <0.001                       |
| Multivariable model + intermediate diseases <sup>3</sup> | 1.0 (REF)                                                                   | 1.00<br>(0.72, 1.37) | 1.29<br>(0.94, 1.79) | 1.24<br>(0.89, 1.72) | 1.18<br>(0.85, 1.64) | 0.16                         |
| <b>Polyunsaturated</b>                                   |                                                                             |                      |                      |                      |                      |                              |
| Median, % of total fat                                   | 9.4                                                                         | 11.9                 | 14.1                 | 16.6                 | 20.3                 |                              |
| Cases                                                    | 76                                                                          | 77                   | 77                   | 77                   | 77                   |                              |
| RR (95%CI) of SCD                                        |                                                                             |                      |                      |                      |                      |                              |
| Multivariable model <sup>2</sup>                         | 1.0 (REF)                                                                   | 1.02<br>(0.74, 1.40) | 0.62<br>(0.45, 0.86) | 0.55<br>(0.40, 0.77) | 0.52<br>(0.37, 0.72) | <0.001                       |
| Multivariable model + intermediate diseases <sup>3</sup> | 1.0 (REF)                                                                   | 1.09<br>(0.79, 1.51) | 0.75<br>(0.54, 1.04) | 0.76<br>(0.55, 1.06) | 0.74<br>(0.53, 1.04) | 0.03                         |
| <b>Monounsaturated fat</b>                               |                                                                             |                      |                      |                      |                      |                              |
| Median, % of total fat                                   | 35.4                                                                        | 38.1                 | 39.6                 | 41.5                 | 44.2                 |                              |
| Cases                                                    | 76                                                                          | 78                   | 77                   | 76                   | 77                   |                              |
| RR (95%CI) of SCD                                        |                                                                             |                      |                      |                      |                      |                              |
| Multivariable model <sup>2</sup>                         | 1.0 (REF)                                                                   | 0.97                 | 1.23                 | 1.36                 | 1.29                 | 0.03                         |

|                                                          |           |                      |                      |                      |                      |      |
|----------------------------------------------------------|-----------|----------------------|----------------------|----------------------|----------------------|------|
|                                                          |           | (0.70, 1.33)         | (0.89, 1.70)         | (0.98, 1.88)         | (0.93, 1.79)         |      |
| Multivariable model + intermediate diseases <sup>3</sup> | 1.0 (REF) | 0.97<br>(0.70, 1.33) | 1.11<br>(0.81, 1.54) | 1.10<br>(0.79, 1.52) | 0.91<br>(0.65, 1.27) | 0.80 |
| <b><i>Trans</i></b>                                      |           |                      |                      |                      |                      |      |
| Median, % of total fat                                   | 3.7       | 4.5                  | 5.3                  | 6.1                  | 7.8                  |      |
| Cases                                                    | 76        | 77                   | 77                   | 77                   | 77                   |      |
| RR (95%CI) of SCD                                        |           |                      |                      |                      |                      |      |
| Multivariable model <sup>2</sup>                         | 1.0 (REF) | 1.10<br>(0.80, 1.52) | 1.00<br>(0.73, 1.38) | 1.03<br>(0.75, 1.42) | 1.21<br>(0.88, 1.67) | 0.31 |
| Multivariable model + intermediate diseases <sup>3</sup> | 1.0 (REF) | 1.06<br>(0.77, 1.45) | 0.97<br>(0.70, 1.34) | 0.94<br>(0.68, 1.29) | 1.03<br>(0.74, 1.42) | 0.99 |

<sup>1</sup> Test for linear trend calculated by assigning the median value of diet score in each quintile and modeling this as a continuous variable in regression models

<sup>2</sup> The RR are estimated from multivariate Cox proportional hazards models adjusted for age (in months), history of diabetes, hypertension, hypercholesterolemia, CHD and cancer at baseline (all yes/no), and %energy from total fat (quintiles), total calories (quintiles), smoking (3 categories), BMI (3 categories), family history of MI (no, before 60, after 60), menopausal status (yes/no), hormone therapy (current, past, never), exercise (4 categories), aspirin use (<1, 1-6, 7+ times/week), use of multivitamins (yes/no), use of vitamin E supplements (yes/no), and alcohol (4 categories) as time-varying covariates.

<sup>3</sup> Intermediate diseases include current diagnosis of hypertension, hypercholesterolemia, diabetes, CHD and stroke, as time-varying covariates
